# Supplementary material for: A reversible SCSC transformation from a blue metamagnetic framework to a pink antiferromagnetic ordering layer exhibiting concomitant solvatochromic and solvatomagnetic effects
Source: Royal Society of Chemistry journal article supplement (doi:10.1039/c2dt30245d), 2012-01-01
Supplement: c2dt30245d.pdf [file c2dt30245d.pdf]

## Electronic supplementary information

### A reversible SCSC transformation from a blue metamagnetic framework to a pink antiferromagnetic ordering layer exhibiting concomitant solvatochromic and solvatomagnetic effects

Zhong-Yi Liu, En-Cui Yang,\* Li-Li Li and Xiao-Jun Zhao\*

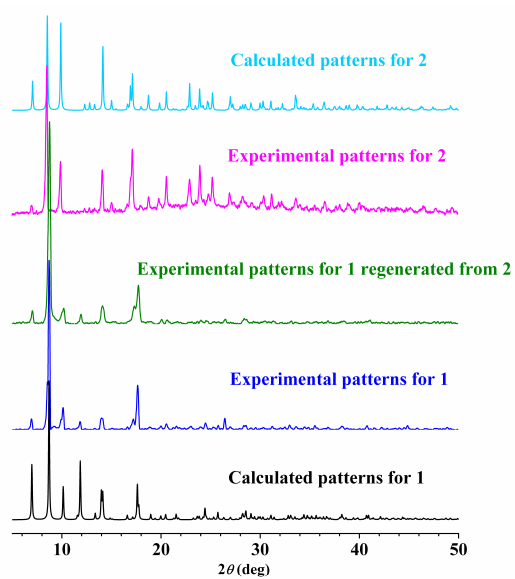

Fig. S1 PXR D patterns for the interconversion between 1 and 2.

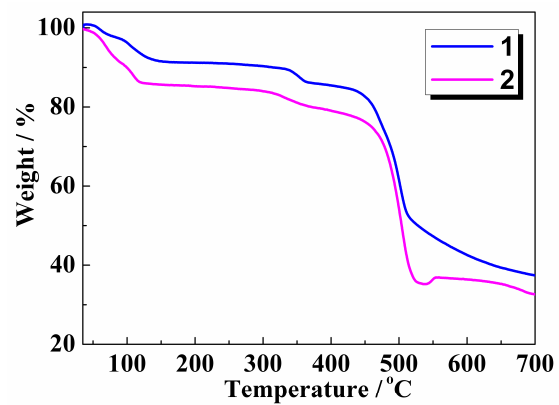

**Fig. S2** TG curves for **1** and **2**.

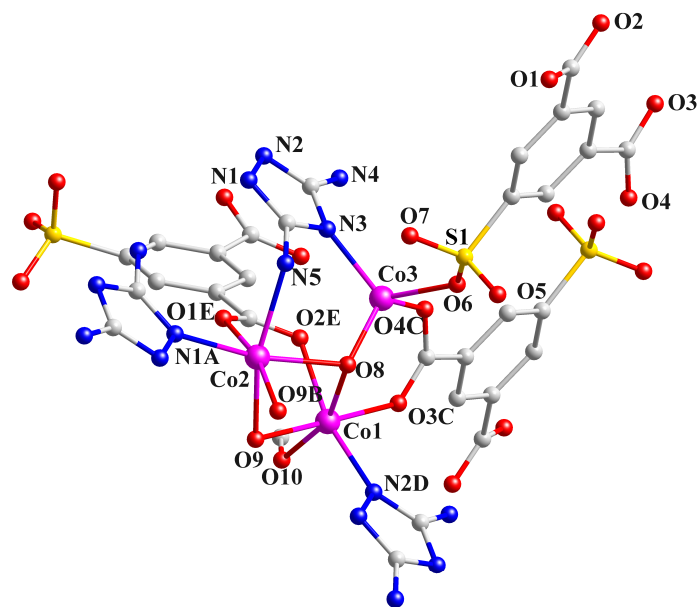

**Fig. S3** Local coordination environments of Co<sup>II</sup> ions in **1** (H atoms were omitted for clarity, symmetry codes:

A =  $-x, 1-y, 2-z$ ; B =  $-x, 2-y, 2-z$ ; C =  $0.5-x, 1.5-y, 2-z$ ; D =  $x, 1-y, 0.5+z$ ).

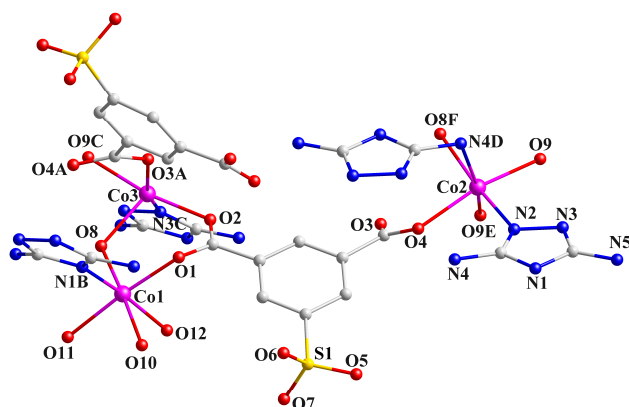

**Fig. S4** Local coordination environments of  $\text{Co}^{\text{II}}$  ions in **2** (H atoms were omitted for clarity, symmetry codes:  $A = 1 - x, y - 0.5, 1.5 - z$ ;  $B = 1 + x, 1.5 - y, 0.5 + z$ ;  $C = 1 + x, 2.5 - y, 0.5 + z$ ;  $D = -x, 2 - y, 1 - z$ ;  $E = -x, 3 - y, 1 - z$ ;  $F = 1 - x, 0.5 + y, 1.5 - z$ ).

**Table S1** Hydrogen-bonding Parameters for **2**.

| D–H...A                    | <i>d</i> (D–H) | <i>d</i> (H...A) | <i>d</i> (D...A) | ∠DHA |
|----------------------------|----------------|------------------|------------------|------|
| O10–H10B...O7 <sup>a</sup> | 0.840          | 2.09             | 2.928(5)         | 171  |
| O11–H11A...O6 <sup>a</sup> | 0.840          | 1.96             | 2.753(4)         | 157  |

<sup>a</sup> Symmetry transformations used to generate equivalent atoms: <sup>a</sup> 1 – *x*, 1 – *y*, 2 – *z*.

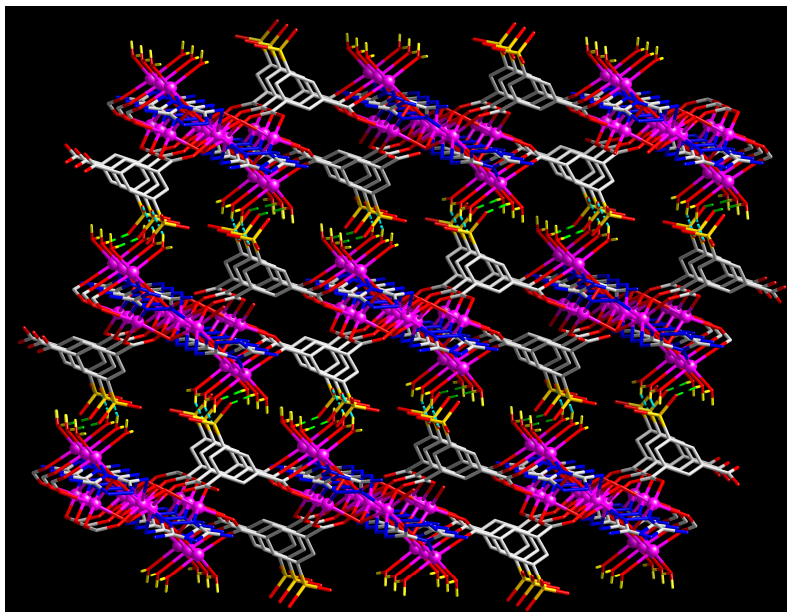

**Fig. S5** 3D supramolecular network of **2** formed by O–H...O hydrogen-bonding interactions.

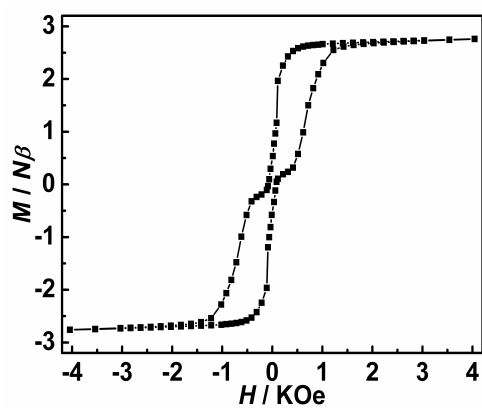

Fig. S6 Hysteresis loop for 1 at 2 K.

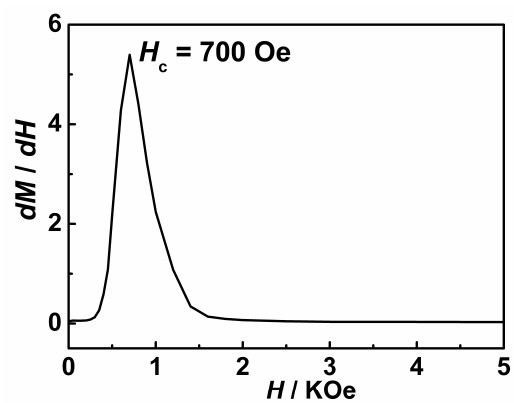

Fig. S7 The  $dM/dH$  derivative curve for **1** at 2 K.



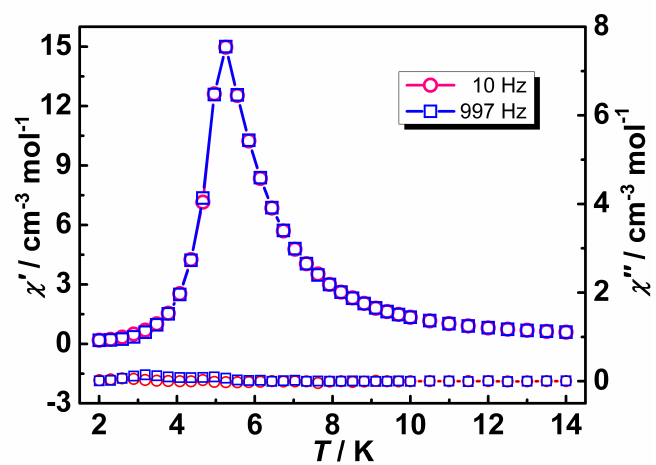

**Fig. S8** Real ( $\chi'$ ) and imaginary ( $\chi''$ ) ac magnetic susceptibility in zero applied dc field at 10 and 997 Hz for **2**.
